# Supplementary material
Source: Royal Society of Chemistry journal article supplement (doi:10.1039/d6tc00329j)
Supplement: d6tc00329j1.pdf [file d6tc00329j1.pdf]

## Supporting Information

### PEI-Based Nanocomposite with Dual-Functionally Complementary Fillers for Synergistic Enhancement of Energy Storage Performance

*Qiaoyu Yang*<sup>a</sup>, *Ying Lin*<sup>\*a</sup>, *Yanlong Ma*<sup>a</sup>, *Zhener Dang*<sup>a</sup>, *Min Yang*<sup>a</sup>, *Gaoyuan Xuan*<sup>b</sup>,  
*Qibin Yuan*<sup>\*b</sup> and *Haibo Yang*<sup>\*a</sup>

a. School of Materials Science and Engineering, Shaanxi Key Laboratory of Green Preparation and Functionalization for Inorganic Materials, Shaanxi University of Science and Technology, Xi'an 710021, China

b. School of Electronic Information and Artificial Intelligence, Shaanxi University of Science and Technology, Xi'an, Shaanxi 710021, China.

\*Corresponding authors:

(Ying Lin<sup>\*a</sup>) E-mail: [linyingsust@ust.edu.cn](mailto:linyingsust@ust.edu.cn)

(Qibin Yuan<sup>\*b</sup>) E-mail: [yuanqibin-sust@163.com](mailto:yuanqibin-sust@163.com)

(Haibo Yang<sup>\*a</sup>) E-mail: [yanghaibo@ust.edu.cn](mailto:yanghaibo@ust.edu.cn)

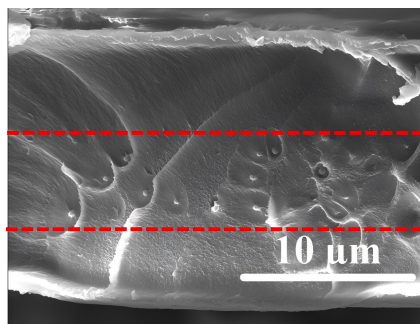

**Fig. S1.** Cross-sectional SEM image of P-0.5Z-P .

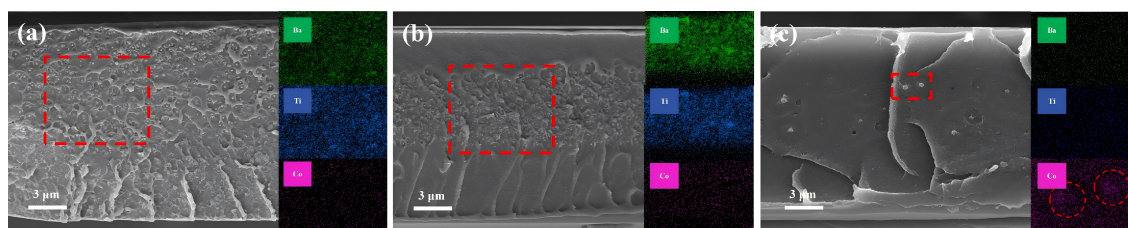

**Fig. S2** Cross-sectional EDX mapping of (a) P/0.5ZB, (b) P-0.5ZB-P, and (c) P-0.5Z-P.

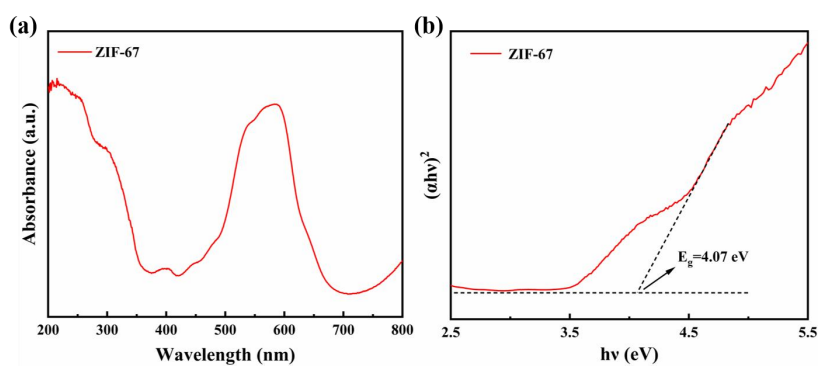

**Fig. S3.** (a) UV-Vis absorption spectrum and (b)  $(\alpha hv)^2$ - $h\nu$  plot of ZIF-67.

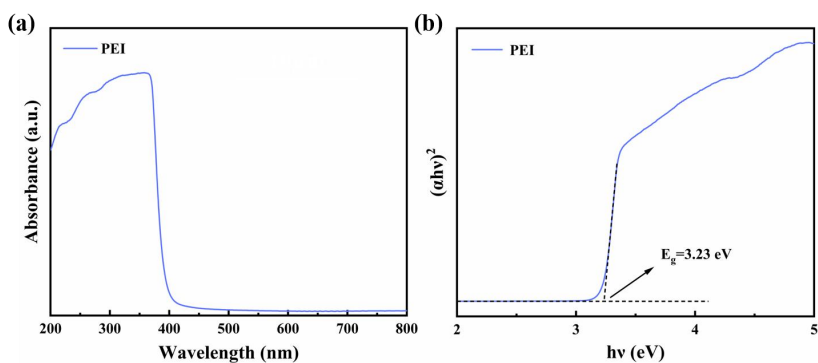

**Fig. S4.** (a) UV-Vis absorption spectrum and (b)  $(\alpha hv)^2$ - $h\nu$  plot of PEI.

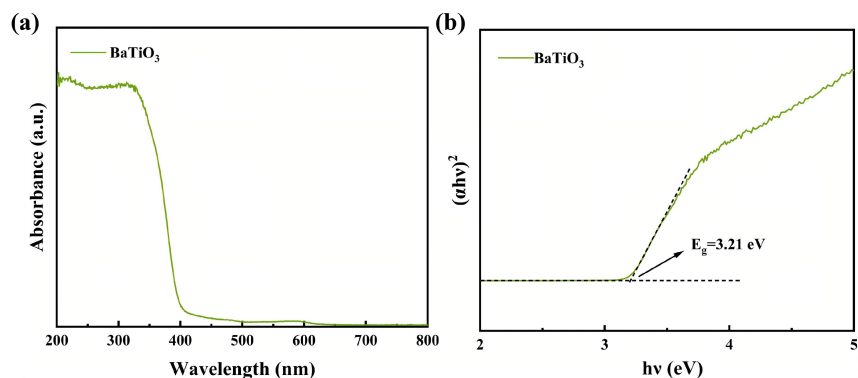

**Fig. S5.** (a) UV-Vis absorption spectrum and (b)  $(\alpha hv)^2$ - $h\nu$  plot of BaTiO<sub>3</sub> NPs.

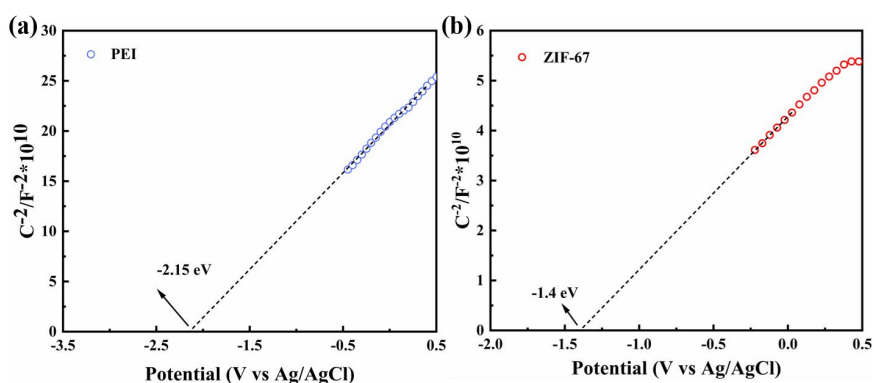

**Fig. S6.** Mott-Schottky plot of (a) ZIF-67 and (b) PEI.

Fig. S3 to 5 displays the UV-Vis absorption spectra and the  $(\alpha hv)^2$ - $h\nu$  plots of ZIF-67 and PEI. Fig. S6 displays the Mott-Schottky curves of ZIF-67 and PEI. The results show that the band gaps of ZIF-67, PEI, and BaTiO<sub>3</sub> NPs are 4.07 eV, 3.23 eV, and 3.21 eV respectively, indicating a discrepancy in their band structures<sup>1,2</sup>.

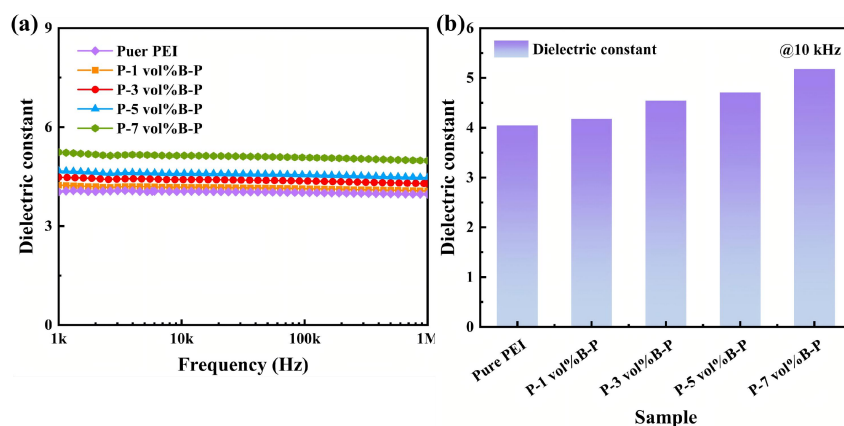

**Fig. S7.** (a) Frequency dependence of  $\epsilon_r$  and (b) precise  $\epsilon_r$  values at 10 kHz for P-B-P with different BaTiO<sub>3</sub> NPs contents.

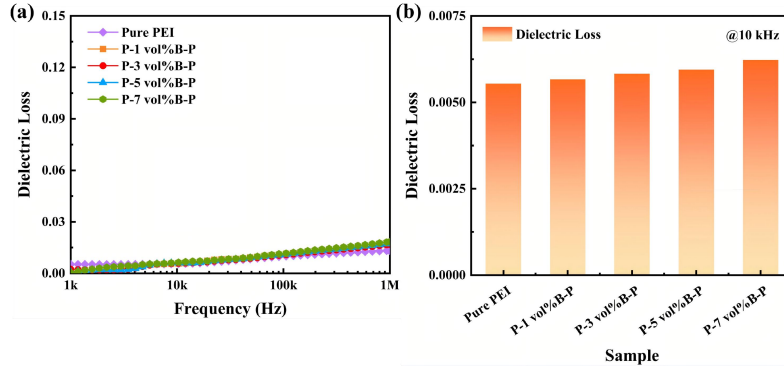

**Fig. S8.** (a) Frequency dependence of  $\tan\delta$  and (b) precise  $\tan\delta$  values at 10 kHz for P-B-P with different BaTiO<sub>3</sub> NPs contents.

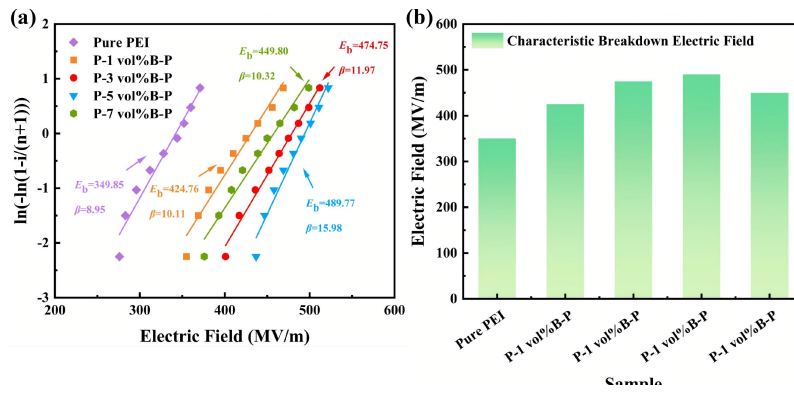

**Fig. S9.** (a) Weibull distribution and (b) characteristic breakdown strength of P-B-P with different BaTiO<sub>3</sub> NPs contents.

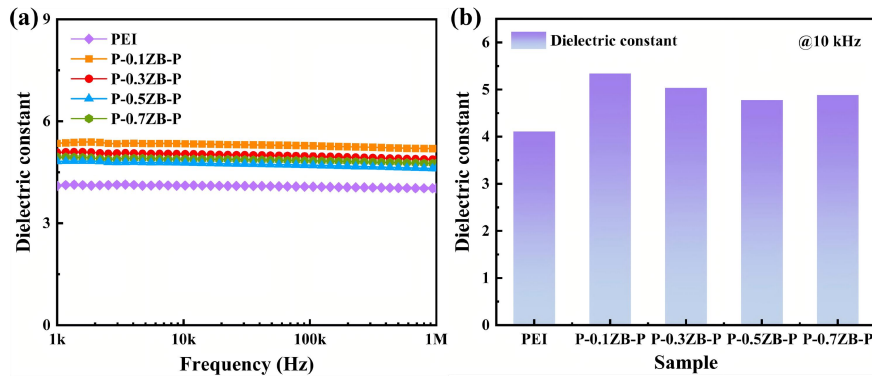

**Fig. S10.** Frequency dependence of (a)  $\epsilon_r$  and (b) precise  $\epsilon_r$  values at 10 kHz for P-ZB-P with different ZIF-67 contents.

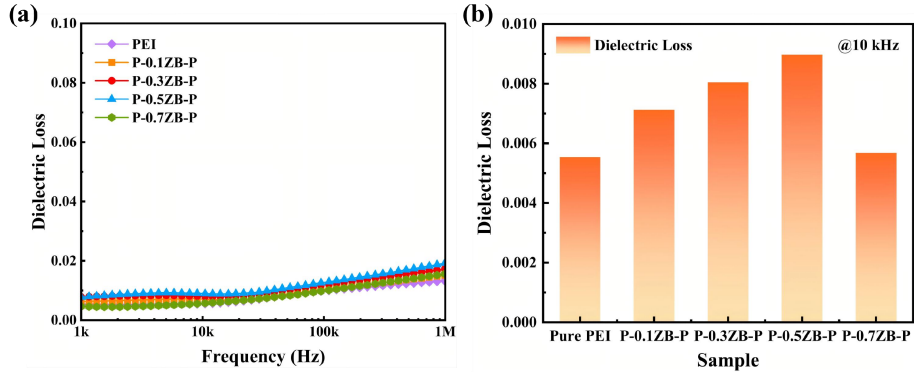

**Fig. S11.** Frequency dependence of (a)  $\tan\delta$  and (b) precise  $\tan\delta$  values at 10 kHz for P-ZB-P with different ZIF-67 contents.

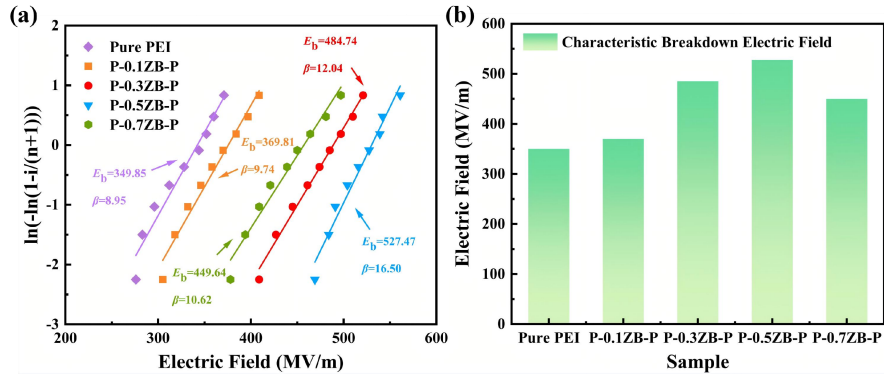

**Fig. S12.** (a) Weibull distribution and (b) characteristic breakdown strength of P-ZB-P with different ZIF-67 contents.

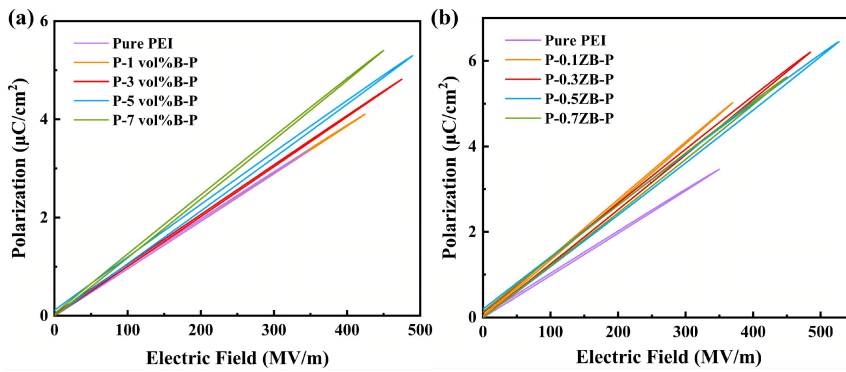

**Fig. S13.** (a)  $P$ - $E$  loops of P-B-P with different BaTiO<sub>3</sub> NP contents and (b) P-ZB-P with different ZIF-67 contents.

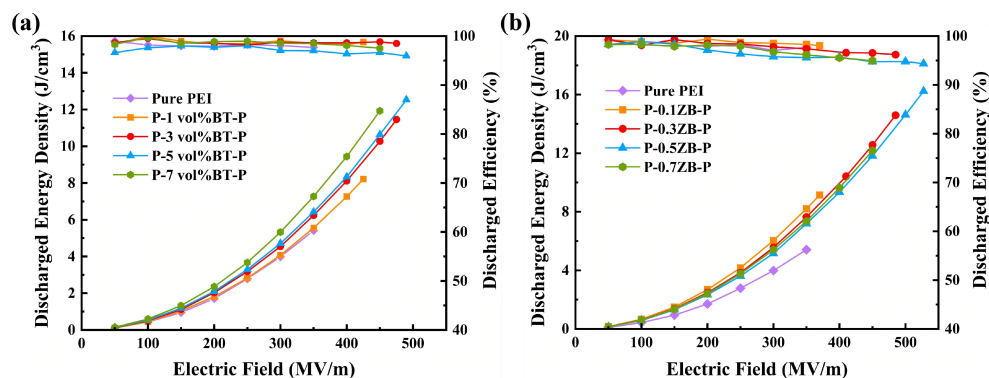

**Fig. S14.**  $U_c$  and  $\eta$  of (a) P-B-P with different BaTiO<sub>3</sub> NP contents and (b) P-ZB-P with different ZIF-67 contents.

In this experiment, a series of films including P-B-P and P-ZB-P were fabricated. Fig. S7 to 9, Fig. S12 and 13 present the dielectric and energy storage properties of the P-B-P nanocomposites. Among them, the sample with a middle layer containing 24.64 wt% BaTiO<sub>3</sub> NPs, denoted as P-24.64B-P (where “B” in the text represents 24.64B), exhibited the optimal performance. Based on this, ZIF-67 was incorporated into the middle blend layer to prepare P-ZB-P nanocomposites, with the best-performing sample being P-0.5ZB-P (as shown in Fig. S10 to 14). Finally, P/0.5ZB, P-0.5ZB-P, and P-0.5Z-P were prepared as control groups, and their dielectric properties and energy storage performance were characterized.

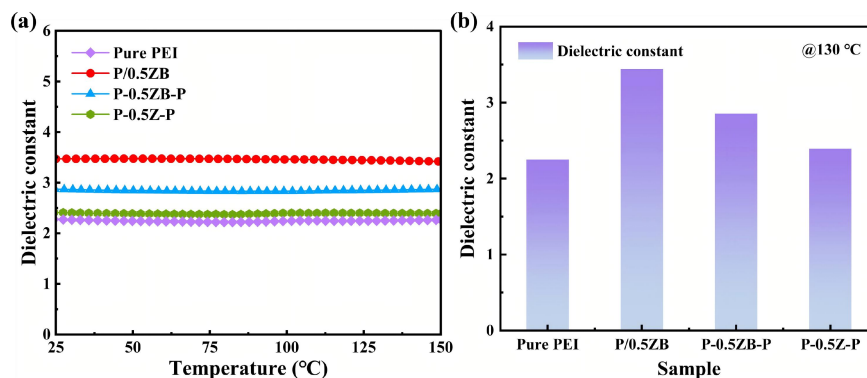

**Fig. S15.** Temperature dependence of (a)  $\epsilon_r$  and (b) precise  $\epsilon_r$  values at 130 °C for pure PEI, P/0.5ZB, P-0.5ZB-P, and P-0.5Z-P.

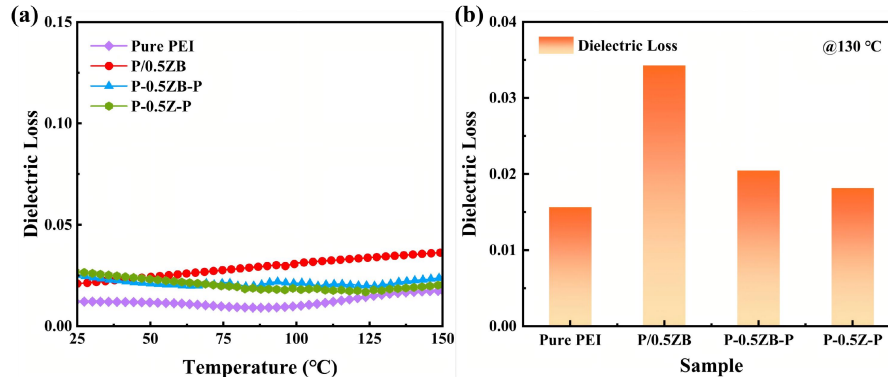

**Fig. S16.** Temperature dependence of (a)  $\tan\delta$  and (b) precise  $\tan\delta$  values at 130 °C for pure PEI, P/0.5ZB, P-0.5ZB-P, and P-0.5Z-P.

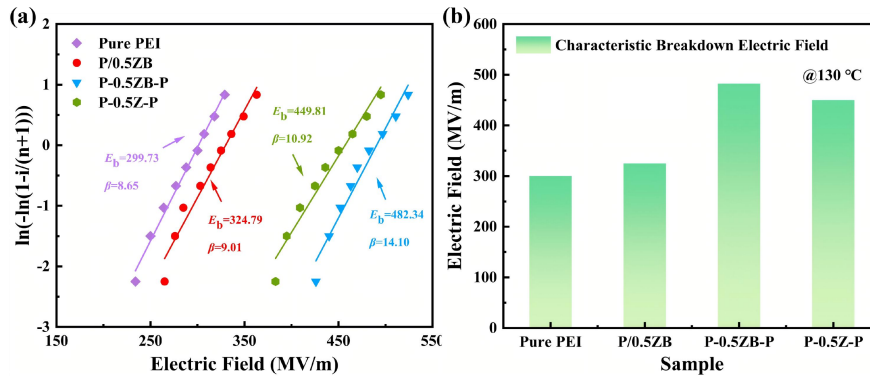

**Fig. S17.** (a) Weibull distribution and (b) characteristic breakdown strength of pure PEI, P/0.5ZB, P-0.5ZB-P, and P-0.5Z-P at 130 °C.

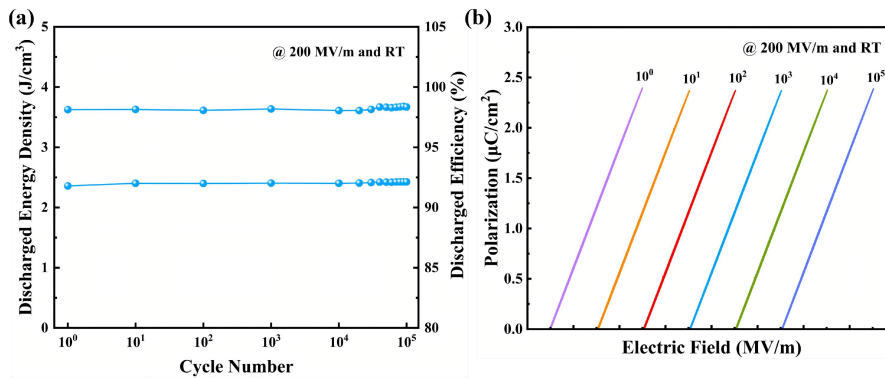

**Fig. S18.** Variation of  $U_e$  and  $\eta$  of the P-0.5ZB-P nanocomposite with cycle number under an applied electric field of 200 MV/m, with P- E cycles ranging from 1 to  $10^5$ .

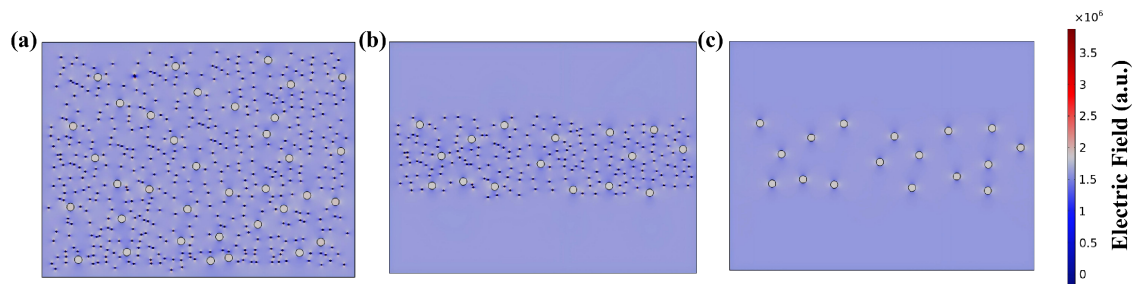

**Fig. S19.** The electric field distribution simulation images of (a) P/0.5Z, (b) P-0.5ZB-P, and (c) P-0.5Z-P.

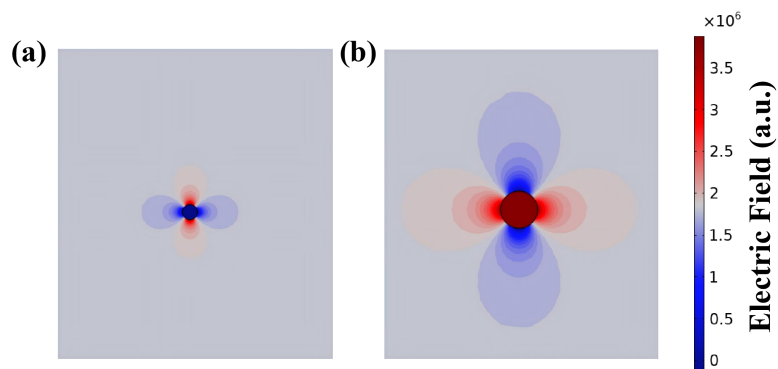

**Fig. S20.** Simulation results of electric field distribution for (a) BaTiO<sub>3</sub> NPs and (b) ZIF-67 in the PEI matrix.

- 1 V.P. Kallupadi, H. Varghese, U.N.S. Hareesh, A. Chandran. *Adv Funct Mater*, 2024, **35**, 2411855.
- 2 Y. Zidi, O. Khaldi, R.E. Patru, L.N. Leonat, M. Enculescu, V. Toma, A. Stepanova, R. Ben Younes, A.C. Galca. *Ceram Int*, 2025, **51**, 18166-18177.
